# Supplementary material for: Salt effects on the picosecond dynamics of lysozyme hydration water investigated by terahertz time-domain spectroscopy and an insight into the Hofmeister series for protein stability and solubility
Source: Royal Society of Chemistry journal article supplement (doi:10.1039/c5cp06324h), 2016-01-01
Supplement: c5cp06324h1.pdf [file c5cp06324h1.pdf]

1 Supporting information for “Salt effects on the  
2 picosecond dynamics of lysozyme hydration  
3 water investigated by terahertz time-domain  
4 spectroscopy and an insight into Hofmeister  
5 series for protein stability and solubility”

6 Katsuyoshi Aoki,<sup>a,\*</sup> Kentaro Shiraki,<sup>b</sup> and Toshiaki Hattori <sup>a,‡</sup>

7 **Lysozyme structure characterization using Fourier trans-**  
8 **form infrared spectroscopy**

9 Denaturation or conformation change of lysozyme may result in a change in the tera-  
10 hertz absorption of lysozyme. Here, we confirmed that, in our experimental conditions,  
11 lysozyme denaturation does not occur by addition of salt using Fourier transform infrared  
12 (FT-IR) spectroscopy in an attenuated total reflection (ATR) geometry. Conformational  
13 change of the protein results in a change in the spectral profile of the amide I band (1600-  
14 1700 cm<sup>-1</sup>).<sup>S1</sup> Dong *et al.*<sup>S1</sup> reported deconvoluted absorption spectra of various proteins  
15 in the amide I region. Deconvolution of the spectra makes the line width of absorption  
16 peaks narrower, which enables us to find the peak positions of each peak components.  
17 They showed that  $\alpha$  helix rich proteins have an absorption peak around 1650-1660 cm<sup>-1</sup>,  
18 whereas  $\beta$  sheet rich proteins have an absorption peak between 1620-1640 cm<sup>-1</sup>. In both

---

<sup>a</sup> *Institute of Applied Physics, University of Tsukuba, 1-1-1 Tennodai, Tsukuba, Ibaraki 305-8573, Japan.*

<sup>b</sup> *Faculty of Pure and Applied Sciences, University of Tsukuba, 1-1-1 Tennodai, Tsukuba, Ibaraki 305-8573, Japan.*

\* Present Address: Physikalisches Chemie II, Ruhr-Universität Bochum, 44801 Bochum, Germany.

‡ To whom correspondence should be addressed. E-mail: hattori@bk.tsukuba.ac.jp

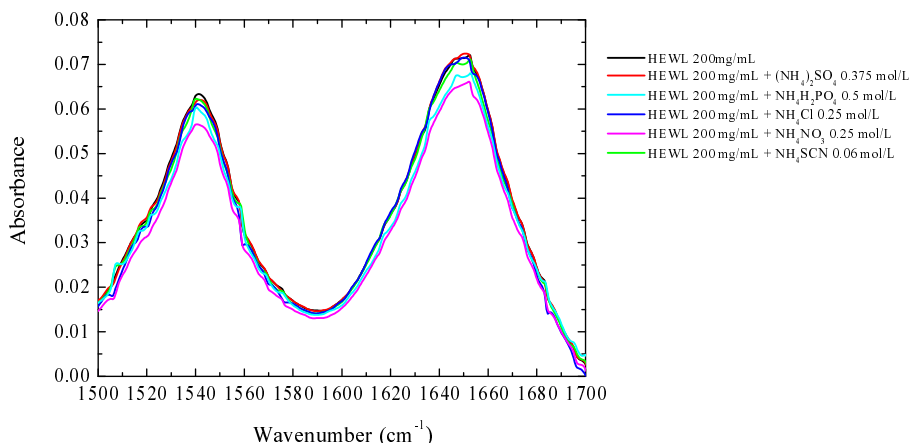

Figure S1. Absorbance spectra of lysozyme in the lysozyme-salt mixed aqueous solutions. The spectrum for  $\text{NH}_4\text{SCN}$  was measured at 20 °C and those for the other salts were measured at 25 °C.

19 the raw absorption spectra before deconvolution and the deconvoluted spectra, spectral  
 20 profile of the absorption clearly depends on the secondary structure of the protein;  $\alpha$   
 21 helix rich proteins have an absorption peak around 1650-1660  $\text{cm}^{-1}$ , whereas  $\beta$  sheet rich  
 22 proteins have an absorption peak in 1620-1640  $\text{cm}^{-1}$ . Therefore, the peak position of  
 23 the absorbance spectra before deconvolution is indicative of the secondary structure of  
 24 the protein. It is expected that the spectral profile and peak position of the absorbance  
 25 spectra provides information corresponding to the circular dichroism (CD) measurements.  
 26 Here, we confirmed that conformation change of lysozyme does not occur from the spectral  
 27 profile and peak position of lysozyme absorption in the amide I band.

28 Absorbance spectra of lysozyme in the lysozyme(200 mg/mL)-salt mixed aqueous  
 29 solution are shown in Fig. S1. Fluctuations on the spectra are attributed to absorption  
 30 by water vapor in the atmosphere. The peak in the spectra is located at 1650  $\text{cm}^{-1}$  and  
 31 is independent of salt. This result indicates that the secondary structure of lysozyme is  
 32 not changed by the addition of salt.

## 33 **Lysozyme concentration dependence of the absorption** 34 **coefficient of the lysozyme aqueous solution**

35 Figure S2 shows the lysozyme concentration dependence of the absorption coefficient of  
36 the lysozyme aqueous solutions. In the low concentration region, the absorption coefficient  
37 of the lysozyme aqueous solution decreased. The absorption coefficient has a peak around  
38 50 mg/mL. A further increase in the concentration results in a monotonical decrease  
39 in the absorption coefficient. At 50 mg/mL, our analysis showed that the absorption  
40 coefficient of water around the lysozyme molecule increases. Increase of the absorption is  
41 attributed to faster dynamics of water around the lysozyme than that of bulk water.<sup>S2</sup> At  
42 this concentration, the distance between the centers of the lysozyme molecules is about  
43 8 nm, when we assume that lysozyme molecules are arranged at lattice points. Since  
44 the diameter of the lysozyme molecule is about 3 nm,<sup>S3</sup> the distance from the lysozyme  
45 surface to the water molecules that are located at the farthest point is estimated to be  
46 about 2.5 nm. A further increase in the concentration should result in an even shorter  
47 distance. For example, the distance is about 1 nm at a lysozyme concentration of 200  
48 mg/mL and the dynamics of water observed is expected to become slower. Therefore,  
49 it is expected that we observed changes in the dynamics of water molecules about 1 nm  
50 from the lysozyme surface in the experiments presented here.

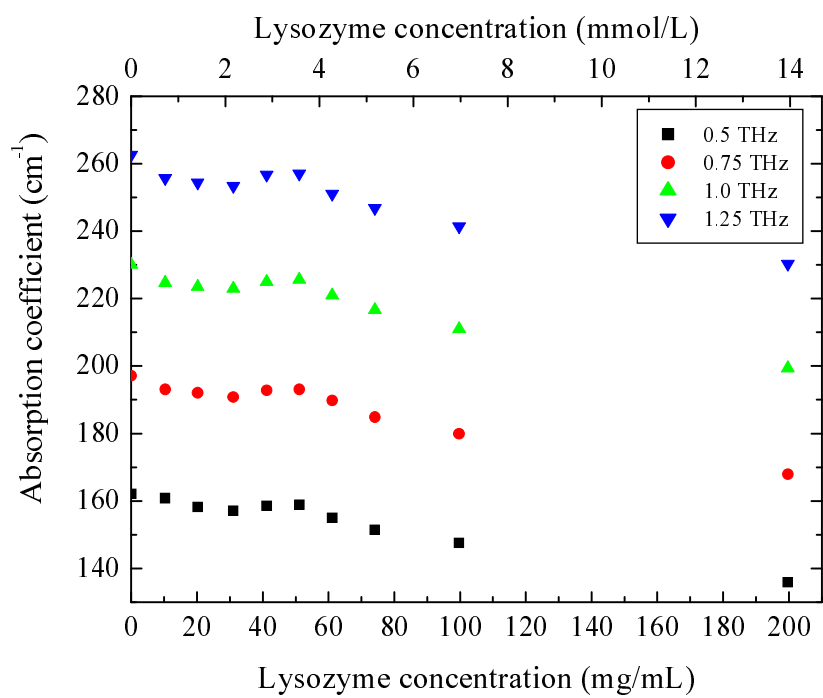

Figure S2. Lysozyme concentration dependence of absorption coefficient of lysozyme aqueous solutions.

51 Enlarged plots showing the absorption coefficient of  
52 lysozyme-salt mixed aqueous solutions in Figure 3

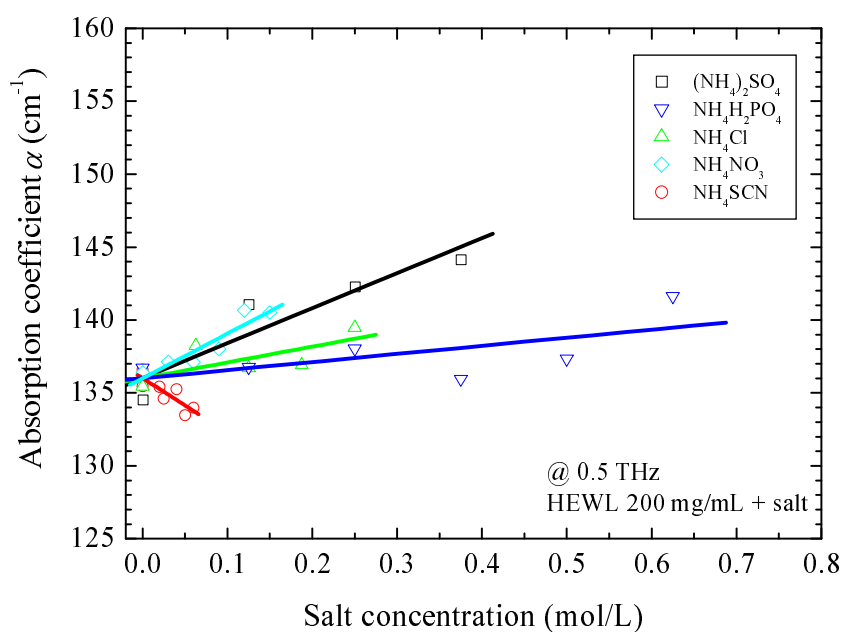

Figure S3. Salt concentration dependence of the lysozyme (200 mg/mL)-salt mixed aqueous solutions at 0.5 THz.

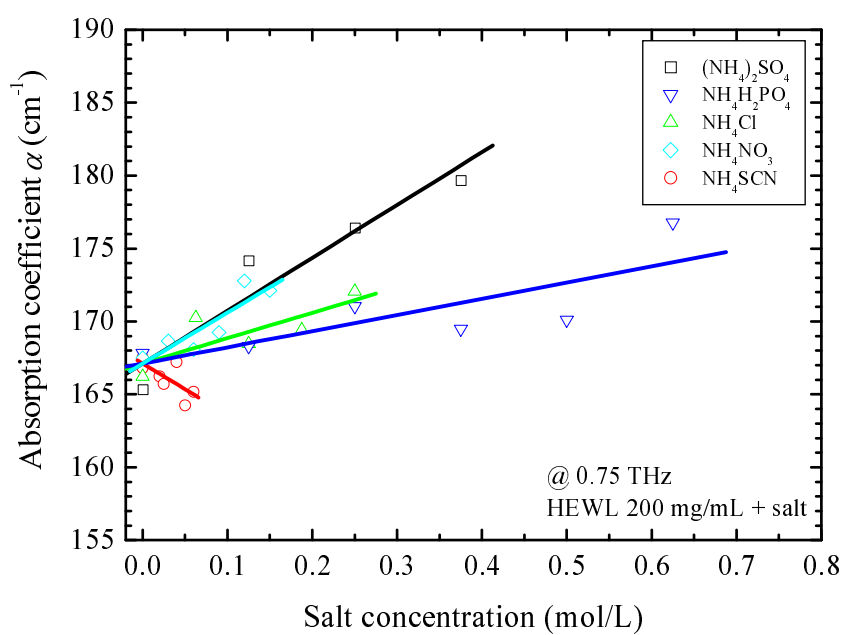

Figure S4. Salt concentration dependence of the lysozyme (200 mg/mL)-salt mixed aqueous solutions at 0.75 THz.

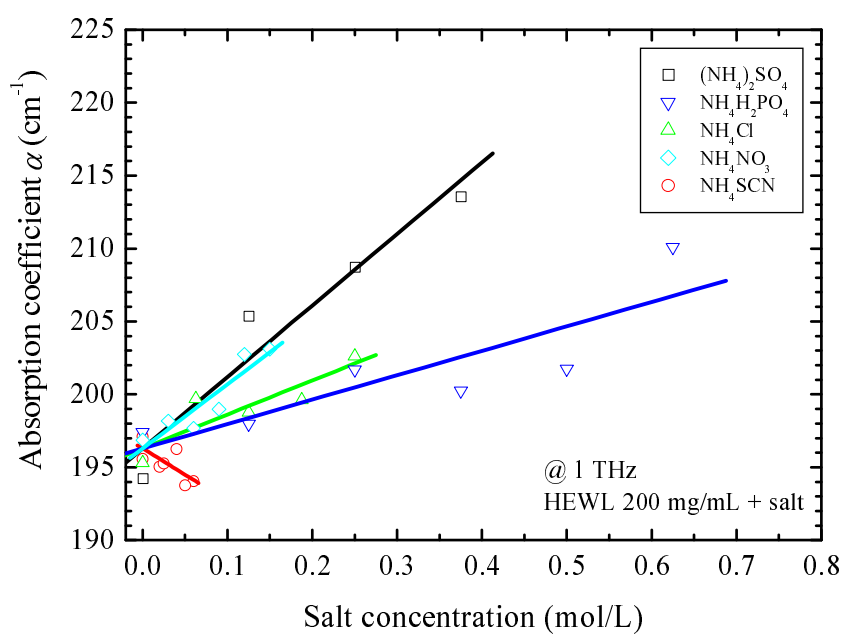

Figure S5. Salt concentration dependence of the lysozyme (200 mg/mL)-salt mixed aqueous solutions at 1.0 THz.

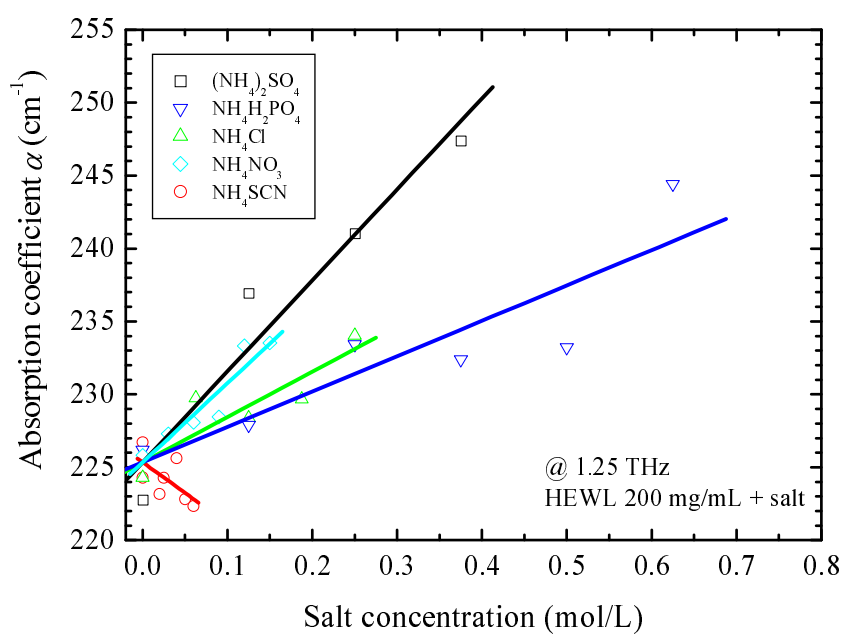

Figure S6. Salt concentration dependence of the lysozyme (200 mg/mL)-salt mixed aqueous solutions at 1.25 THz.



## 53 **References**

- 54 S1 A. Dong, P. Huang and W. S. Caughey, *Biochemistry*, 1990, **29**, 3303–3308.
- 55 S2 M. Heyden and M. Havenith, *Methods*, 2010, **52**, 74–83.
- 56 S3 C. C. F. Blake, D. F. Koenig, G. A. Mair, A. C. T. North, D. C. Phillips and V. R.  
57 Sarma, *Nature*, 1965, **206**, 757–761.
